# 1 **Near-Fibre Electromyography**

2 **Authors** - Mathew Piasecki<sup>1</sup>, Oscar Garnés C. Estruch<sup>2</sup>, Daniel W Stashuk<sup>3</sup>.

## 3 **Affiliations -**

4 1. Clinical, Metabolic and Molecular Physiology, MRC-Versus Arthritis Centre for Musculoskeletal Ageing  
5 Research, National Institute for Health Research (NIHR) Nottingham Biomedical Research Centre,  
6 University of Nottingham, Nottingham, United Kingdom.

7 2. Department of Physical Medicine and Rehabilitation - Clinical Neurophysiology, Jiménez Díaz  
8 Foundation University Hospital, Madrid, Spain

9 3. Department of Systems Design Engineering, University of Waterloo, Ontario, Canada

10 **Keywords** – near fibre electromyography, near fibre motor unit potential, quantitative  
11 electromyography

12 **Corresponding Author:** Dr Mathew Piasecki, University of Nottingham,  
13 mathew.piasecki@nottingham.ac.uk

## 14 **Abstract**

15 Near fibre electromyography (NFEMG) is the use of specifically high-pass filtered motor unit potential  
16 (MUPs) (i.e. near fibre MUPs (NFMs)) extracted from needle-detected EMG signals for the examination of  
17 changes in motor unit (MU) morphology and electrophysiology caused by neuromuscular disorders or  
18 ageing. The concepts of NFEMG, the parameters used, including NFM duration and dispersion, which  
19 relates to fibre diameter variability and/or endplate scatter, and a new measure of neuromuscular  
20 junction transmission (NMJ) instability, NFM segment jitter, and the methods for obtaining their values  
21 are explained. Evaluations using simulated needle-detected EMG data and exemplary human data are  
22 presented, described and discussed. The data presented demonstrate the ability of using NFEMG  
23 parameters to detect changes in MU fibre diameter variability, end plate scatter, and neuromuscular  
24 transmission time variability. These changes can be detected prior to alterations of MU size, numbers or  
25 muscle recruitment patterns.

## 26 **1.0 Introduction**

27 A motor unit (MU) is comprised of a somatic motor neuron (MN), its axon and distal axonal branches,  
28 neuromuscular junctions (NMJs) and associated skeletal muscle fibres. Neuromuscular disorders can  
29 affect somatic MNs, their axons, axonal branches, NMJs and/or associated muscle fibres. Anatomically  
30 neuromuscular disorders can cause loss of somatic MNs, axonal demyelination, and MU remodelling; fibre  
31 denervation and the sprouting of new axonal branches and the formation of new NMJs, acting to minimise  
32 muscle fibre loss; and fibre atrophy and/or hypertrophy. Electrophysiologically, neuromuscular disorders

33 can cause NMJ transmission delay, increased NMJ transmission time variability and/or NMJ transmission  
34 failure (Daube 2000). An effective way of detecting the anatomical and electrophysiological effects of a  
35 neuromuscular disorder, and therefore its presence and extent, is to examine electrical signals generated  
36 by nerves and muscles. With respect to an affected muscle, these anatomical and electrophysiological  
37 alterations can be inferred by characterizing its electrophysiology via the detection and analysis of  
38 electromyographic signals.

39 The discharge/activation of a MN creates a trans-axolemmal or axonal action potential (AAP), which  
40 propagates along its axon and each axonal branch to initiate neuromuscular transmission to its associated  
41 muscle fibre. Successful neuromuscular transmission results in the generation of propagating trans-  
42 sarcolemmal or muscle fibre action potentials (MFAPs) and coordinated contraction of the sarcomeres of  
43 the associated muscle fibre. As such, the MU is the fundamental element of muscle force generation  
44 (Heckman and Enoka 2012).

45 Extracellular electrodes placed in or on a skeletal muscle can detect the time changing electric potentials  
46 created by the propagating MFAPs of a MU. The time changing electric potential created by the  
47 propagating MFAPs of a single muscle fibre can be considered a muscle fibre potential (MFP) while the  
48 summation of the MFPs created by the fibres of a MU is called a motor unit potential (MUP). For a healthy  
49 MU, each discharge of a MN will result in the generation of a MFAP in each fibre of the MU. As such,  
50 MUPs represent the summation of the MFPs of all of the MU fibres.

51 During the activation of a healthy muscle, populations of MUs are recruited and independently discharge  
52 at pseudo-regular firing times to generate a desired level of muscle force. With simple level or window  
53 triggering or more sophisticated pattern recognition methods, MUP trains (MUPTs) (i.e. sets of  
54 consecutively detected MUPs generated by the same MU) can be extracted from a recorded EMG signal.  
55 The number of trains extracted can be indicative of the level of MU recruitment. The occurrence times of  
56 the MUPs within MUPTs can be indicative of MU discharge patterns. Both of these are related to a  
57 combination of muscle anatomy and electrophysiology. For known levels of activation, the number of  
58 MUs recruited, their discharge patterns and anatomical characteristics can be used to infer the presence  
59 and extent of a neuromuscular disorder.

60 MU recruitment and firing patterns can be used to infer the relative numbers and sizes of MUs in a muscle  
61 (Sonoo 2002). A typical MUP within a train or a calculated MUP template can be used to infer MU  
62 anatomical features, such as size and the extent of terminal axonal branching. MUP shape instability  
63 within a train can be used to infer electrophysiological features, such as terminal AAP and/or MFAP

64 conduction velocity variability in combination with NMJ transmission time variability. NMJ transmission  
65 time variability is often much greater than AAP and/or MFAP conduction velocity variability and therefore  
66 greater MUP instability largely reflects NMJ transmission time variability.

67 More specifically, standard clinical EMG examinations are now, almost exclusively, based on signals  
68 detected using concentric needle electrodes. During low-level muscle activation, MUPTs are extracted  
69 using triggering or pattern recognition techniques. MU recruitment is qualitatively –i.e. subjectively-  
70 assessed at increasing levels of force, whereas discharge patterns are usually not considered. A  
71 representative or template MUP is used to infer MU size based on MUP duration, amplitude and/or area.  
72 Increased MUP size is expected to be related to axonal sprouting which is in turn related to re-innervation  
73 of denervated muscle fibres and indicative of MN loss. Reduced MUP size is expected to be related to  
74 fibre loss, atrophy or NMJ blocking. Axonal sprouting and fibre atrophy or hypertrophy are indirectly  
75 assessed using the number of phases and/or the number of turns in the representative or template MUP.  
76 The formation of new NMJs and NMJ transmission delay, NMJ transmission time variability and/or NMJ  
77 transmission failure are assessed using either separate SFEMG examination techniques (which are more  
78 accurate though time consuming) or using a triggering technique and high-pass filtered EMG signals at  
79 low levels of contraction to evaluate MUP complexity and morphological instability (i.e. jiggle).

80 Specific aspects of neuromuscular disease could be better detected if signals better reflecting the  
81 anatomical and electrophysiological effects of disease on individual muscle fibres could be assessed. In  
82 general, it is not possible to detect only the MFP created by the MFAP of a single muscle fibre. However,  
83 as the characteristics of a MFP generated by a muscle fibre are dependent on fibre diameter and its radial  
84 distance to the electrode detection surface, as radial distance increases, the amplitude and high frequency  
85 content of a detected MFP decreases. This means that MFP contributions to a MUP from distant fibres  
86 will be of lower amplitude and have a greater proportion of lower frequency energy. Conversely, MFP  
87 contributions from near fibres (NFs) will be of higher amplitude and have a greater proportion of higher  
88 frequency energy. Electrodes with smaller detection surface area increase the disparity of the radial  
89 distances across the fibres of MU and, for a given electrode position relative to the fibres of a MU, allow  
90 some fibres to be effectively near the electrode and some to be distant. For a suitably positioned electrode  
91 with small detection surface area, the number of muscle fibres with small radial distance (i.e. the number  
92 of NFs) can be small and the detected MUP will be primarily composed of NF MFPs and significant NF MFP  
93 contributions may be detected. As suggested by Payan (1978) the use of high-pass filtering enhances the  
94 effects of radial distance, and in effect, for the same detection surface area, reduces the number of NFs

95 and increases the chance of detecting significant NF MFP contributions. This is essentially the basis of  
96 single-fibre electromyography (SFEMG) whether using a traditional single-fibre or concentric needle  
97 electrode (Sanders & Stålberg, 1996; Stålberg, 2012). Because of the enhancement of NF contributions  
98 relative to distant fibre contributions, a suitably high-pass filtered concentric-needle detected MUP is  
99 called a NF MUP (NFM).

100 Near fibre electromyography (NFEMG) is the study of NFMs for the assessment of the sprouting of new  
101 unmyelinated axonal branches and the formation of new NMJs, NMJ transmission delay, NMJ  
102 transmission time variability or NMJ transmission failure and muscle fibre loss, atrophy or hypertrophy.  
103 Several previous studies (Allen et al. 2015; Hourigan et al. 2015; Piasecki et al. 2016b, 2016a, 2020; Power  
104 et al. 2016; Gilmore et al. 2017; Estruch and Stashuk 2019; Estruch et al. 2019) have incorporated NFEMG  
105 parameters to demonstrate the effects of specific diseases or ageing on individual MUs. The focus of this  
106 paper is to utilise MUPs and NFMs extracted from simulated EMG signals and those obtained from human  
107 muscles to explicitly describe and evaluate a range of NFEMG methods and parameters used to investigate  
108 neuromuscular alterations, including a new measure of NMJ instability, NFM segment jitter. Methods for  
109 MUPT extraction, high-pass filtering, MUP and NFM contamination reduction and parameter calculation  
110 are outlined.

## 111 **2.0 Methods**

### 112 **2.1 Generation of Simulated Motor Unit Data**

113 A commercially available application for creating simulated needle-detected EMG signals was used to  
114 create sets of signals detected using an electrode of known geometry and generated by MUs for which  
115 the numbers of fibres, their sizes, and their radial positions and NMJ axial positions, relative to the  
116 detection surface of the electrode, are known (Stålberg & Karlsson, 2001). The simulated EMG signals  
117 used are simple compared to real EMG data, lacking external 50/60Hz noise and movement artifacts,  
118 however they provide a basis from which useful evaluations of MUP/NFM parameters can be evaluated.

119 The simulation of an EMG signal starts by modelling MUs which comprise a muscle in which the signals  
120 are detected. In this work, a muscle comprised of four MUs was modelled. For each MU, the number of  
121 fibres, their fibre diameter and NMJ axial location distribution and their NMJ transmission time variability  
122 (i.e. jitter), as well as the expected diameter of the MU territory was selected. Firing pattern characteristics  
123 of each MU were also selected. To evaluate the separate effects of fibre diameter variability, end plate  
124 scatter, MU remodelling and jitter on MUP and NFM template and instability parameter values, specific  
125 muscle/EMG detection scenarios were modelled. Except for specific changes related to the scenarios

126 described below, all muscles were simulated with default properties and signals were simulated as being  
127 recorded using the enlarged uptake area of a CNEMG electrode positioned axially 20 mm from the center  
128 of the endplate region, and randomly positioned radially within the territories of the simulated MUs. For  
129 each scenario, ten EMG signals each containing 4 MUPTs were simulated for 10 unique radial needle  
130 positions. Forty MUPTs per scenario were then extracted from the EMG signals using DQEMG algorithms.

## 131 **2.2 Exemplary human data**

132 Exemplary data is presented through three examples (Figures 5 to 7), corresponding to a control,  
133 neurogenic and myopathic subject. Muscles sampled were the gastrocnemius, gastrocnemius, extensor  
134 digitorum communis and vastus lateralis, and deltoid respectively, as detailed in section 3.5.

135 Data for all three cases were collected through retrospective review and were analysed using DQEMG®  
136 with the approval of the local ethics committee (Biomedical Research Institute, Jiménez Díaz Foundation  
137 University Hospital; code EO181-20\_FJD). Diagnoses were those made by the examining neurophysiologist  
138 (OGE) at the time of the study, based on the results of the clinical and neurophysiological examination.  
139 EMG signals were acquired during a sustained mild effort protocol of 10 sec duration as part of the routine  
140 neurophysiological examination. Intramuscular signals were detected with a standard concentric needle  
141 electrode (38 x 0.45 mm (1.5" x 26G) Neuroline Concentric; Ambu®, Denmark). Raw EMG signals were  
142 bandpass filtered (20 Hz - 10 kHz) and stored using a KeyPoint.Net 3.22® device (Alpine Biomed, USA).

## 143 **2.3 MUPT Extraction**

144 To obtain representative as well as shape instability MUP/NFM information a MUPT must be extracted  
145 from a recorded EMG signal from which a representative/template MUP/NFM can be selected or  
146 estimated and across which MUP/NFM shape instability can be measured. MUPTs can be extracted using  
147 level or window trigger or pattern recognition algorithms. In this work, MUPTs were extracted from  
148 simulated or real concentric needle-detected EMG signals using the algorithms contained in DQEMG  
149 (Stashuk 1999a). These algorithms execute the following steps for MUPT extraction and analysis: 1) MUP  
150 detection, 2) initial MUP clustering, 3) supervised MUP classification, 4) MUPT splitting and merging, 5)  
151 extracted MUPT characterization. During MUPT extraction, the current DQEMG algorithms specifically  
152 account for MUP instability within a MUPT.

## 153 **2.4 Choice of High-Pass Filter**

154 To increase the effects of the radial distances to muscle fibres on detected MUPs and thus enhance  
155 contributions of near fibres to detected MUPs, the detected EMG signals are high-pass filtered. For

156 conventional SFEMG analysis signals are usually filtered using a Butterworth high-pass filter with a 500 or  
157 1000 Hz cut-off frequency. Earlier work (Stashuk 1999b), has demonstrated that the use of low-pass-  
158 double-differentiation (LPDD) filters (Usui and Amidror 1982; McGill et al. 1985) have similar amplitude  
159 responses as traditionally-used Butterworth filters, but because of different phase responses create MUPs  
160 in which it is easier to detect the contribution of single muscle fibres (i.e. MFPS). Therefore, in this work,  
161 the NFMs analyzed have been created by LPDD filtering concentric-needle-detected MUPs.

## 162 **2.5 Definition of representative/template MUP and NFM parameters**

163 MUP Area - integral of the absolute value of the MUP values between the onset and end markers, times  
164 the sampling time interval, in  $\mu\text{Vms}$ .

165 MUP Duration - duration between the onset and end markers, in ms.

166 Turns – number of significant slope reversals within the MUP duration (height > 20  $\mu\text{v}$ )

167 NFM Area - integral of the absolute value of the NFM values between the onset and end markers, times  
168 the sampling time interval, in  $\text{kV/s}^2\text{ms}$ .

169 NFM Duration – duration between the onset and end markers of the NF MUP, in ms.

170 NF Count – number of fibre contributions detected within the NFM duration

171 (i.e. significant slope reversals (height > 5\*NF baseline RMS) with similar rising and falling slopes)

172 NF Dispersion – time between the first and last detected fibre contribution, in ms

## 173 **2.6 Definition of MUPT parameters**

174 One objective of analyzing the MUPs comprising a MUPT is to characterize the discharge pattern of the  
175 associated MN using the occurrence or detection times of the composite MUPs. An additional objective  
176 is to assess NMJ transmission time variability and/or AAP and MFAP conduction time variability. The  
177 former of these is the focus of SFEMG, in which a fibre pair (FP) jitter measurement is obtained when a  
178 pair of fibre contributions are repeatedly detected in successive MUPs across a MUPT, and the variance  
179 of their inter potential intervals (IPIs) is used to characterize the NMJ transmission time variability of the  
180 fibre pair. To obtain a measure related to the NMJ transmission time variability of a larger number of NMJs  
181 of a MU, statistics related to the instability of the shapes of the MUPs of a MUPT, such a jiggle, have been  
182 developed (Stålberg & Sonoo, 1994). In this work, MUP jiggle has been measured using the MUPs of  
183 MUPTs as well as NFM jiggle using LPDD filtered MUPs of MUPTs.

184 Jiggle values, and those of other similar global-MUP-shape based statistics (Stålberg & Sonoo, 1994),  
185 represent a larger number of NMJs of a MU than do fibre pair jitter measurements, are dependent on  
186 shape changes and therefore the relative sizes of MUP segments and not purely their temporal variability,  
187 and have normalized units which indirectly represent NMJ transmission time variability. A new statistic  
188 called NFM segment jitter (NFM SJ) is introduced in this work, which represents a larger number of NMJs  
189 of a MU than do fibre pair jitter measurements, is independent of the relative sizes of MUP segments and  
190 more dependent on their temporal variability and is measured in  $\mu\text{s}$ , to more directly represent NMJ  
191 transmission time variability.

192 To accurately assess NMJ transmission and/or AP conduction velocity variability using extracted MUPTs,  
193 the MUPs of each MUPT must first be aligned to each other. In this work, MUPs within a train are aligned  
194 during the process of MUPT extraction using methods similar to the correlation maximization method of  
195 Campos et al (2000).

#### 196 2.6.1 Calculation of NFM Segment Jitter (NFM SJ):

197 Given a set of  $N$ , NFMs comprising a MUPT, let  $\text{NFM}_i$  represent the  $i^{\text{th}}$  NFM of the MUPT.

198 Each  $\text{NFM}_i$  is a set of consecutive sample values.

199 Each  $\text{NFM}_i$  of the MUPT is divided into  $S_i$  segments.

200 A NFM segment is an interval of a NFM over which the absolute change in the amplitude of the NFM  
201 amplitude is equal to a threshold amount, `segmentHeight`.

202  $\text{NFM}_{ij}$  is the  $j^{\text{th}}$  segment of  $\text{NFM}_i$ .

203  $\text{NFM}_{ij}$  is a set of consecutive samples from  $\text{NFM}_i$  such that  $\text{NFM}_{ij1}$  is the starting index in  $\text{NFM}_i$  of the  $j^{\text{th}}$   
204 segment and  $\text{NFM}_{ij2}$  is the ending index in  $\text{NFM}_i$  of the  $j^{\text{th}}$  segment.

205 Therefore,  $|\text{NFM}_{ij1} - \text{NFM}_{ij2}| = \text{segmentHeight}$

206 The segments of a NFM are contiguous.

207 Therefore,  $\text{NFM}_{i(j+1)1} = \text{NFM}_{ij2} + 1$

208 `WeightedShiftSum` = 0

209 `SumOfWeights` = 0

210 For  $i = 1$  to  $i = N$

211     For  $j = 1$  to  $j = S_i$

212         If ( $i < N$ )

213             Calculate the optimal shift  $s_{ij}$  between segment  $\text{NFM}_{ij}$  and  $\text{NFM}_{i+1}$

214             by successively shifting  $\text{NFM}_{ij}$  relative to  $\text{NFM}_{i+1}$  to maximize their shape similarity  $w_{ij}$

215             `WeightedShiftSum` = `WeightedShiftSum` +  $s_{ij} * w_{ij}$

216             `SumOfWeights` = `SumOfWeights` +  $w_{ij}$

217         If ( $i > 1$ )

218             Calculate the optimal shift  $s_{ij}$  between segment  $\text{NFM}_{ij}$  and  $\text{NFM}_{i-1}$

219             by successively shifting  $\text{NFM}_{ij}$  relative to  $\text{NFM}_{i-1}$  to maximize their shape similarity  $w_{ij}$

220  $\text{WeightedShiftSum} = \text{WeightedShiftSum} + s_{ij} * w_{ij}$

221  $\text{SumOfWeights} = \text{SumOfWeights} + w_{ij}$

222  $\text{NFM Segment jitter} = \text{WeightedShiftSum} / \text{SumOfWeights}$

223 In this work, the value of segmentHeight was the greater of 0.10% of the NFM template peak to peak  
224 voltage and 5 times the baseline RMS.

225 The value of  $s_{ij}$  was constrained to be in the range between -200  $\mu\text{s}$  to +200  $\mu\text{s}$ .

## 226 **2.7 Definition and Selection of Isolated MUPs/NFMs:**

227 To accurately assess NMJ transmission and/or AP conduction velocity variability using detected  
228 MUPs/NFMs it is also essential that the MUPs/NFMs used represent the activation of a single MU and not  
229 be contaminated by the activity of other MUs. Such MUPs/NFMs, can be characterized as isolated  
230 MUPs/NFMs. To select isolated MUPs/NFMs within a MUPT, NFMs contaminated with contributions of  
231 other MUs need to be excluded. MUP/NFM contamination will cause a segment of a MUP/NFM to have  
232 significantly different values than corresponding segments of previous and subsequent MUPs/NFMs.  
233 Detecting these significant differences must take into account the inherent instability of the shapes of the  
234 NFMs within the train as well as any trend in NFM shape across the train due to needle movement.  
235 MUP/NFM instability measures are calculated over the NFM duration of the representative or template  
236 NFM. Therefore, an isolated NFM only needs to be contamination free across the NFM duration interval.

### 237 **2.7.1 Selecting Isolated NFMs:**

238 An isolated NFM is not significantly contaminated by the activity of other MUs.

239 A set of isolated NFMs allow the estimation of the true electrophysiological instability of the NFMs  
240 generated by a MU.

241 Given a set of N, NFMs comprising a MUPT, let  $\text{NFM}_i$  represent the  $i^{\text{th}}$  NFM of the MUPT.

242 Each  $\text{NFM}_i$  is a set of consecutive sample values.

243 Let  $\text{NFM}_t$  be the NF MUP template used to represent the N, NFMs of the MUPT.

244 The  $\text{NFM}_t$  of the MUPT is divided into  $S_t$  segments.

245 A  $\text{NFM}_t$  segment is an interval of the  $\text{NFM}_t$  over which the absolute change in the amplitude of the  
246  $\text{NFM}_t$  amplitude is equal to a threshold amount, segmentHeight.

247  $\text{NFM}_{t_j}$  is the  $j^{\text{th}}$  segment of the  $\text{NFM}_t$ .

248  $\text{NFM}_{t_j}$  is a set of consecutive samples from the  $\text{NFM}_t$  such that  $\text{NFM}_{t_{j1}}$  is the starting index in the  
249  $\text{NFM}_t$  of the  $j^{\text{th}}$  segment and  $\text{NFM}_{t_{j2}}$  is the ending index in the  $\text{NFM}_t$  of the  $j^{\text{th}}$  segment.

250 Therefore,  $|\text{NFM}_{t_{j1}} - \text{NFM}_{t_{j2}}| = \text{segmentHeight}$

251 The segments of the  $\text{NFM}_t$  are contiguous.

252 Therefore,  $\text{NFM}_{t_{(j+1)1}} = \text{NFM}_{t_{j2}} + 1$

253 Each of the N NFMs in the MUPT are positioned as rows in a two dimensional array with N rows and k  
254 columns, where k is the number of samples in  $\text{NFM}_t$ .

255 Each of the N NFMs in the MUPT are segmentally aligned with the respective  $S_t$  segments of  $\text{NFM}_t$  to  
256 produce k columns of aligned NFM values.



257 Across each of the  $k$  aligned NFM value columns an average mean absolute consecutive difference (MACD)  
258 is calculated, with  $MACD_j$  being the value for the  $j^{th}$  column.

259 A NFM is considered isolated if for each of its  $k$  samples the average absolute deviation of  $m$  consecutive  
260 samples, centered at  $k$ , from  $m$  corresponding samples of the previous isolated NFM and from  $m$   
261 corresponding samples of the NFM template are less than  $10 * MACD_k$ , where  $m$  corresponds to the  
262 number of samples required to span  $100 \mu s$ .

263 Having a vector of MACD values allows the level of expected variation (i.e. the amount of acceptable  
264 contamination) to be different for each time point across the set of NFMs with in the MUPT. Therefore,  
265 the threshold values used as criteria for significant contamination in the baseline segments of the MUPT  
266 will be more restrictive (have smaller values) that the threshold values used during the higher energy  
267 segments. This in turn, allows the shape variability across the NFMs of the MUPT to be accurately  
268 measured. The alignment of portions of the NFMs with the NFM template allow for more accurate  
269 estimation of the noise present.

## 270 **2.8 Statistical Analysis**

271 All statistical analysis was completed using STATA (v.15). All parameters within each scenario were  
272 assessed across levels of severity (i.e. increasing fibre diameter variability) using multi-level mixed effects  
273 linear regression models, with each needle position a fixed factor. Beta ( $\beta$ ) coefficients and 95%  
274 confidence intervals are reported. Significance was accepted at  $p < 0.05$ .

## 275 **3.0 Results**

### 276 **3.1 Increasing fibre diameter variability**

277 Four sets of 40 MUPTs were extracted from EMG signals recorded from muscles with MUs having default  
278 mean fibre diameters ( $50 \mu m$ ) with diameter standard deviations of 1, 5, 10 and  $15 \mu m$ . Figure 1 panels A  
279 to C show MUP and NFM size parameters across increases in fibre diameter variability. Increased MFP  
280 temporal dispersion associated with increased fibre diameter variability decreases MUP area (Figure 1A)  
281 and increases MUP duration (Figure 1C), but does not affect NFM area (Figure 1B).

282 Figure 1 panels D and F show number of MUP turns and NF count values across increases in fibre diameter  
283 variability, respectively. All of these complexity related measures increase with the increased MFP  
284 temporal dispersion associated with increased fibre diameter variability. With increased MFP dispersion,  
285 increased numbers of underlying MFP contributions become evident/detectable. Figure 1 panels E and G  
286 show NFM duration and NF dispersion across increases in fibre diameter variability, respectively. Increases  
287 in MFP temporal dispersion are clearly and consistently reflected in all of these measures. Figure 1 panels

288 H and J show MUP and NFM jiggle values, while panel I shows NFM segment jitter values across increases  
289 in fibre diameter variability. Even though the modelled NMJ jitter was constant, across the increasing  
290 levels of modelled fibre diameter variability, increased average MFP dispersion caused increased shape  
291 instability. This caused more consistent increases in MUP versus NFM jiggle, evidenced by the larger  
292 relative  $\beta$  coefficient ( $\beta/CI$ ) and for MUP jiggle. The temporally-based NFM segment jitter values show  
293 moderate increases as indicated by the small relative  $\beta$  value.

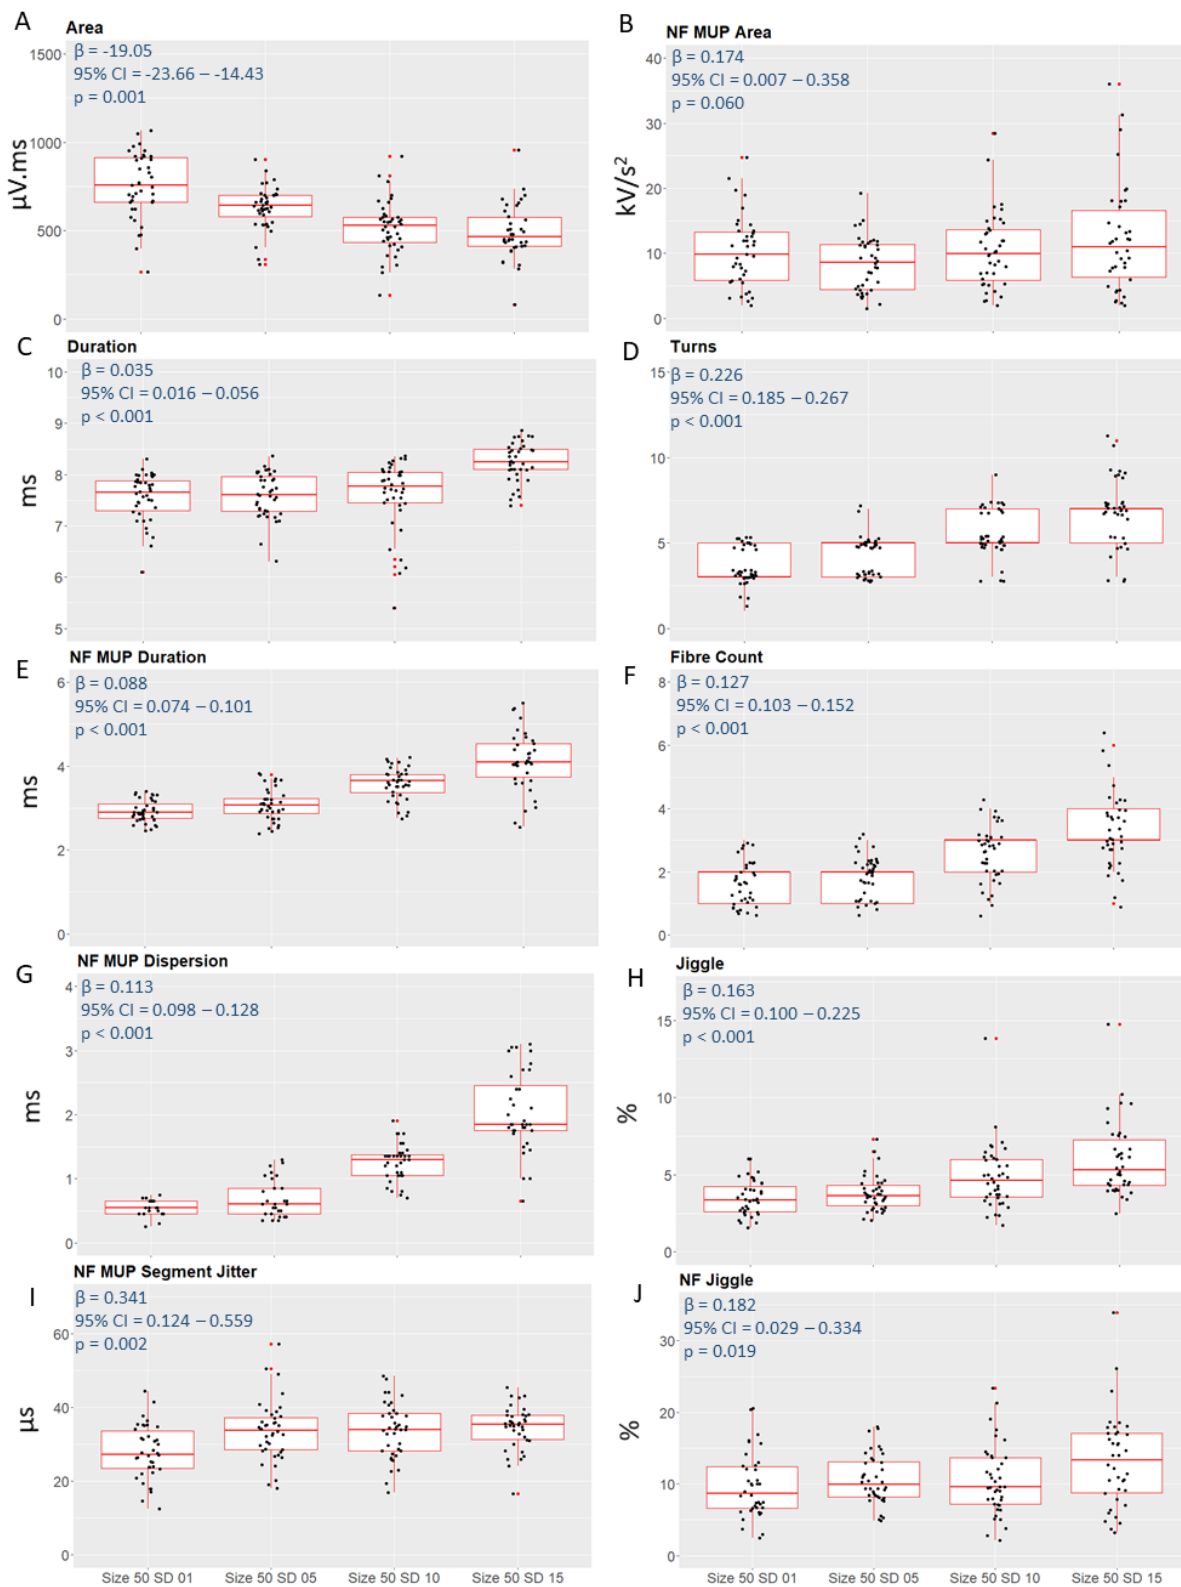

295 **Figure 1.** Motor unit potential and near fibre motor unit potential parameters with increases in fibre  
296 diameter variability. Beta coefficients, 95% confidence intervals and p values from multi level mixed  
297 effects linear regression shown inset for each parameter.

### 298 3.2 Increasing NMJ axial location variability

299 Five sets of 40 MUPTs were extracted from EMG signals recorded from muscles with MUs having constant  
300 fibre size, and mean axial endplate locations of 0 mm with endplate location standard deviations of 1, 2,  
301 5, 7, and 10 mm. Figure 2 panels A to C show MUP and NFM size parameters across increases in end plate  
302 scatter. As with increasing fibre diameter variability, increased MFP temporal dispersion associated with  
303 increased end plate scatter clearly decreases MUP area (Figure 2A) and increases MUP duration (Figure  
304 2C), but only moderately increases NFM area (Figure 2B).

305 Figure 2 panels D and F show number of MUP turns and NF count values across increases in end plate  
306 scatter, respectively. All of these complexity related measures increased with the increased MFP temporal  
307 dispersion associated with increased end plate scatter. The increases in numbers of turns and NF count  
308 were greater than for the study of increased fibre diameter variability (range of mean turns values 4-10  
309 versus 4-8; range of mean NF count values 2-6 versus 2-3). Figure 2 panels E and G show NFM duration  
310 and NF dispersion values across increases in end plate scatter, respectively. Increases in MFP temporal  
311 dispersion are clearly and consistently reflected in all of these measures. As with the complexity measures,  
312 the NFM duration, and NF dispersion values were about greater than for the study of increased fibre  
313 diameter variability (range of mean NFM duration values 2.5-7.5 versus 2.5-4; range of mean NF  
314 dispersion values 0.5-4.5 versus 0.5-2). Figure 2 panels H and J show MUP and NFM jiggle values, while  
315 panel I shows NFM segment jitter values across increases in end plate scatter. Even though the modelled  
316 NMJ jitter was constant, across the increasing levels of modelled end plate scatter, increased average MFP  
317 dispersion lead to increased shape instability. This caused more consistent increases in MUP versus NFM  
318 jiggle, evidenced by the larger relative  $\beta$  coefficient ( $\beta/CI$ ) for MUP jiggle. The temporally-based NFM  
319 segment jitter values show clear increases as indicated by the large relative  $\beta$  value.

320

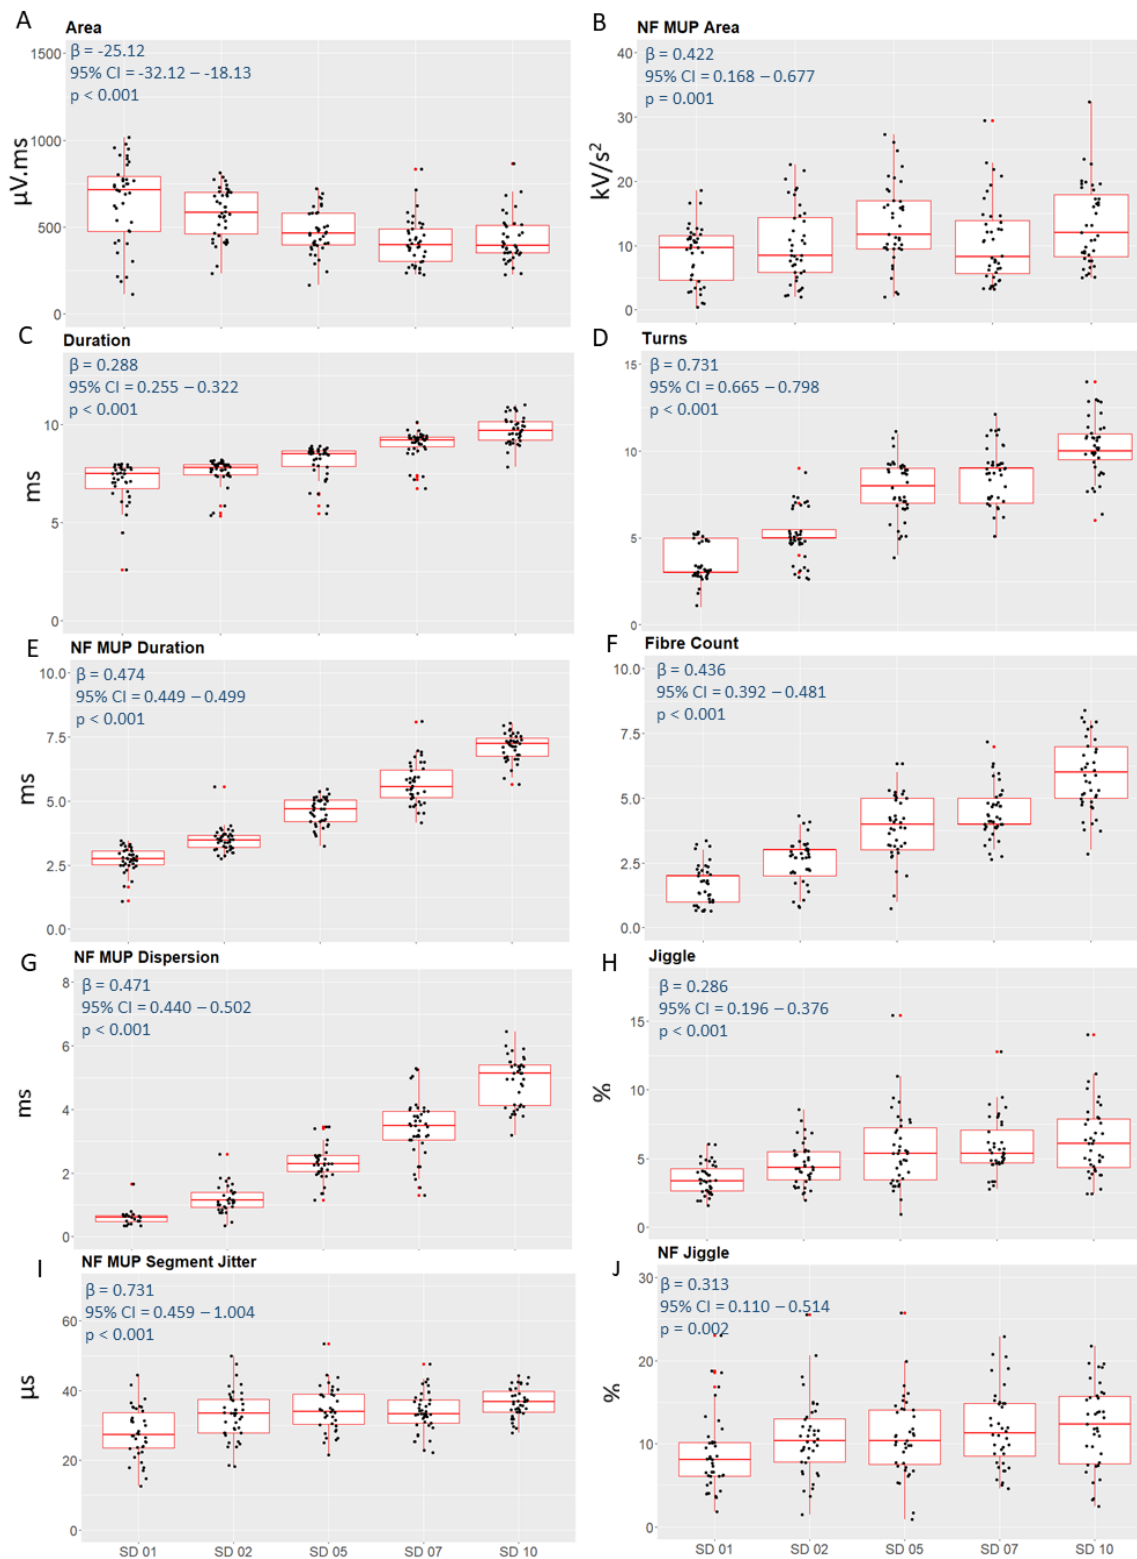

321

322 **Figure 2.** Motor unit potential and near fibre motor unit potential parameters with increases in end plate  
 323 scatter. Beta coefficients, 95% confidence intervals and p values from multi level mixed effects linear  
 324 regression shown inset for each parameter.

325 3.3 Simulated MU diminution and expansion

326 To consider a simple model of partial/distal denervation and reinnervation with fibre atrophy and  
327 hypertrophy, four sets of 40 MUPTs related to 4 degrees of involvement were extracted. The MUs were  
328 simulated to have characteristic as outlined in Table 1 below. Of the 4 simulated MUs for each muscle, 2  
329 have ‘denervated’ and 2 have ‘compensated/reinnervated’ characteristics. Where fibre number is  
330 increased, so is fibre diameter variability and endplate scatter.

331 **Table 1.** Features of remodelled motor units

|                  | <b>Healthy</b> | <b>Denervated</b> |    |    |    | <b>Reinnervated</b> |     |     |     |
|------------------|----------------|-------------------|----|----|----|---------------------|-----|-----|-----|
| Model            |                | 1                 | 2  | 3  | 4  | 1                   | 2   | 3   | 4   |
| Fibre number     | 100            | 90                | 80 | 70 | 60 | 110                 | 120 | 130 | 140 |
| Fibre Dia SD     | 5              | 5                 | 5  | 5  | 5  | 7                   | 10  | 13  | 15  |
| Endplate pos. SD | 1              | 1                 | 1  | 1  | 1  | 3                   | 5   | 7   | 10  |

332 Fibre number is the number of MU fibres, Fibre Dia SD is the standard deviation of the MU fibre diameters  
333 and Endplate pos. SD is the standard deviation of the axial endplate locations about the mean axial end  
334 plate location (20mm).

335  
336 Figure 3 panel A shows MUP area decreasing with denervation and remaining unchanged with  
337 reinnervation relative to the default model. Only at the highest level of involvement simulated do  
338 reinnervated MUs have increased MUP area relative to denervated MUs. For denervated MUs, the  
339 decreases in MUP area are not due to increased temporal dispersion of the MFPs comprising the  
340 simulated MUPs but only the reduced numbers of MU fibres. For the reinnervated MUs, the increased  
341 temporal MFP dispersion, caused by increased fibre diameter variability and increased end plate scatter,  
342 combined with increased numbers of MU fibres result in no clear trend in MUP area. MUP duration  
343 however, shown in Figure 3 panel C, clearly decreases and increases for denervated and reinnervated  
344 MUs, respectively, as expected. NFM area, shown in Figure 3 panel B, did not change with denervation.  
345 With reinnervation, NFM area was increased with respect to the default and denervated models, but with  
346 increased variability no trend with reinnervation was evident. Figure 3 panels D and F do not show any  
347 trends in the numbers of turns and NF count values with increased denervation. The constant fibre  
348 diameter variability and end plate scatter modelled across the levels of increased denervation modelled  
349 resulted in no changes to these complexity measures despite the reduced numbers of MU fibres. These  
350 panels do show increasing trends in the numbers of turns and NF count values with increased  
351 reinnervation. The increased fibre diameter variability and end plate scatter modelled across the levels of  
352 increased reinnervation modelled resulted in clear changes to these complexity measures despite the  
353 increased numbers of MU fibres.

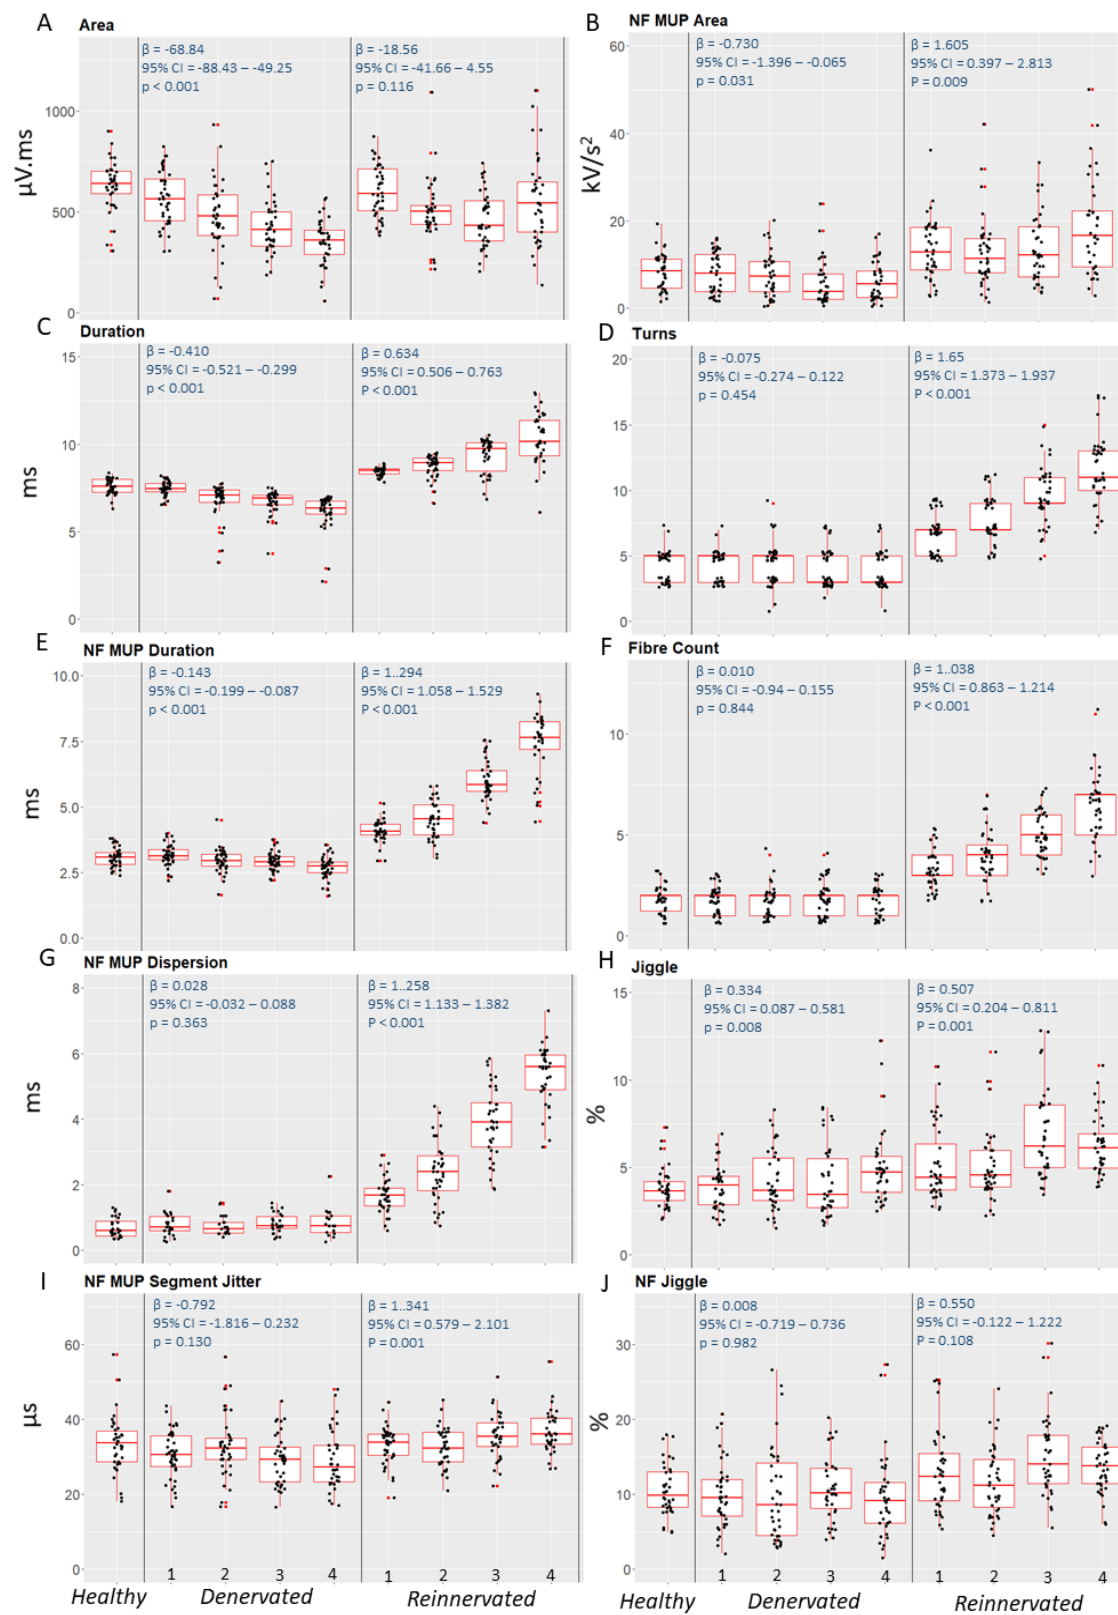

355 **Figure 3.** Motor unit potential and near fibre motor unit potential parameters with decreases or increases  
356 in the numbers of MU fibres. For increases in the numbers of MU fibres, fibre diameter variability and end  
357 plate scatter are also increased (See Table 1 for details). Beta coefficients, 95% confidence intervals and  
358 p values from multi level mixed effects linear regression shown inset for each parameter.

359  
360 Figure 3 panels E and G do not show any trends in NFM duration or NFM dispersion with increased  
361 denervation. The constant fibre diameter variability and end plate scatter modelled across the levels of  
362 increased denervation modelled resulted in no changes to these NFM measures. These panels do show  
363 increasing trends in NFM duration or NF dispersion with increased reinnervation. The increased fibre  
364 diameter variability and end plate scatter modelled across the levels of increased reinnervation modelled  
365 resulted in clear changes to these NFM measures. Figure 3 panels H, J and I do not show any trends in  
366 MUP or NFM jiggle and NFM segment jitter with increased denervation, respectively. These panels do  
367 show increasing trends in MUP jiggle and NFM segment jitter, but not NFM jiggle with increased  
368 reinnervation. With the constant amount of NMJ jitter modelled across the increasing levels of  
369 denervation and reinnervation modelled no trend in instability measures are expected. However, the  
370 increased fibre diameter variability and end plate scatter modelled across the levels of increased  
371 reinnervation modelled resulted in increased MUP jiggle and NFM segment jitter values.

#### 372 3.4 Increasing levels of jitter (NMJ transmission time variability)

373 Six levels of jitter (NMJ transmission time variability) were modelled (20, 40, 60, 80, 100, and 120  $\mu$ s). For  
374 each jitter level, ten EMG signals each containing 4 MUPTs were simulated for 10 unique radial needle  
375 positions. Forty MUPTs were then extracted from the EMG signals for each level of jitter using DQEMG  
376 algorithms. Figure 4 panels A to C show MUP and NFM size parameters across increases in jitter. Increased  
377 MFP temporal dispersion associated with increased jitter does not decrease MUP area, except for 120  $\mu$ s  
378 jitter, (Figure 4A), while NFM area (Figure 4B) and MUP duration (Figure 4C) do not change across all jitter  
379 values studied. Figure 4 panels D and F show no changes in number of MUP turns or NF count values  
380 across all increases in jitter studied. Figure 4 panels E and G show no changes in NFM duration or NF  
381 dispersion across all increases in jitter studied. Figure 4 panels H and J show MUP and NFM jiggle values,  
382 while panel I shows NFM segment jitter values across increases in jitter. All of these measures clearly  
383 reflect the increases in modelled jitter. The temporally-based NFM segment jitter values, with units in  $\mu$ s,  
384 had the highest  $\beta$  and relative  $\beta$  values.

385



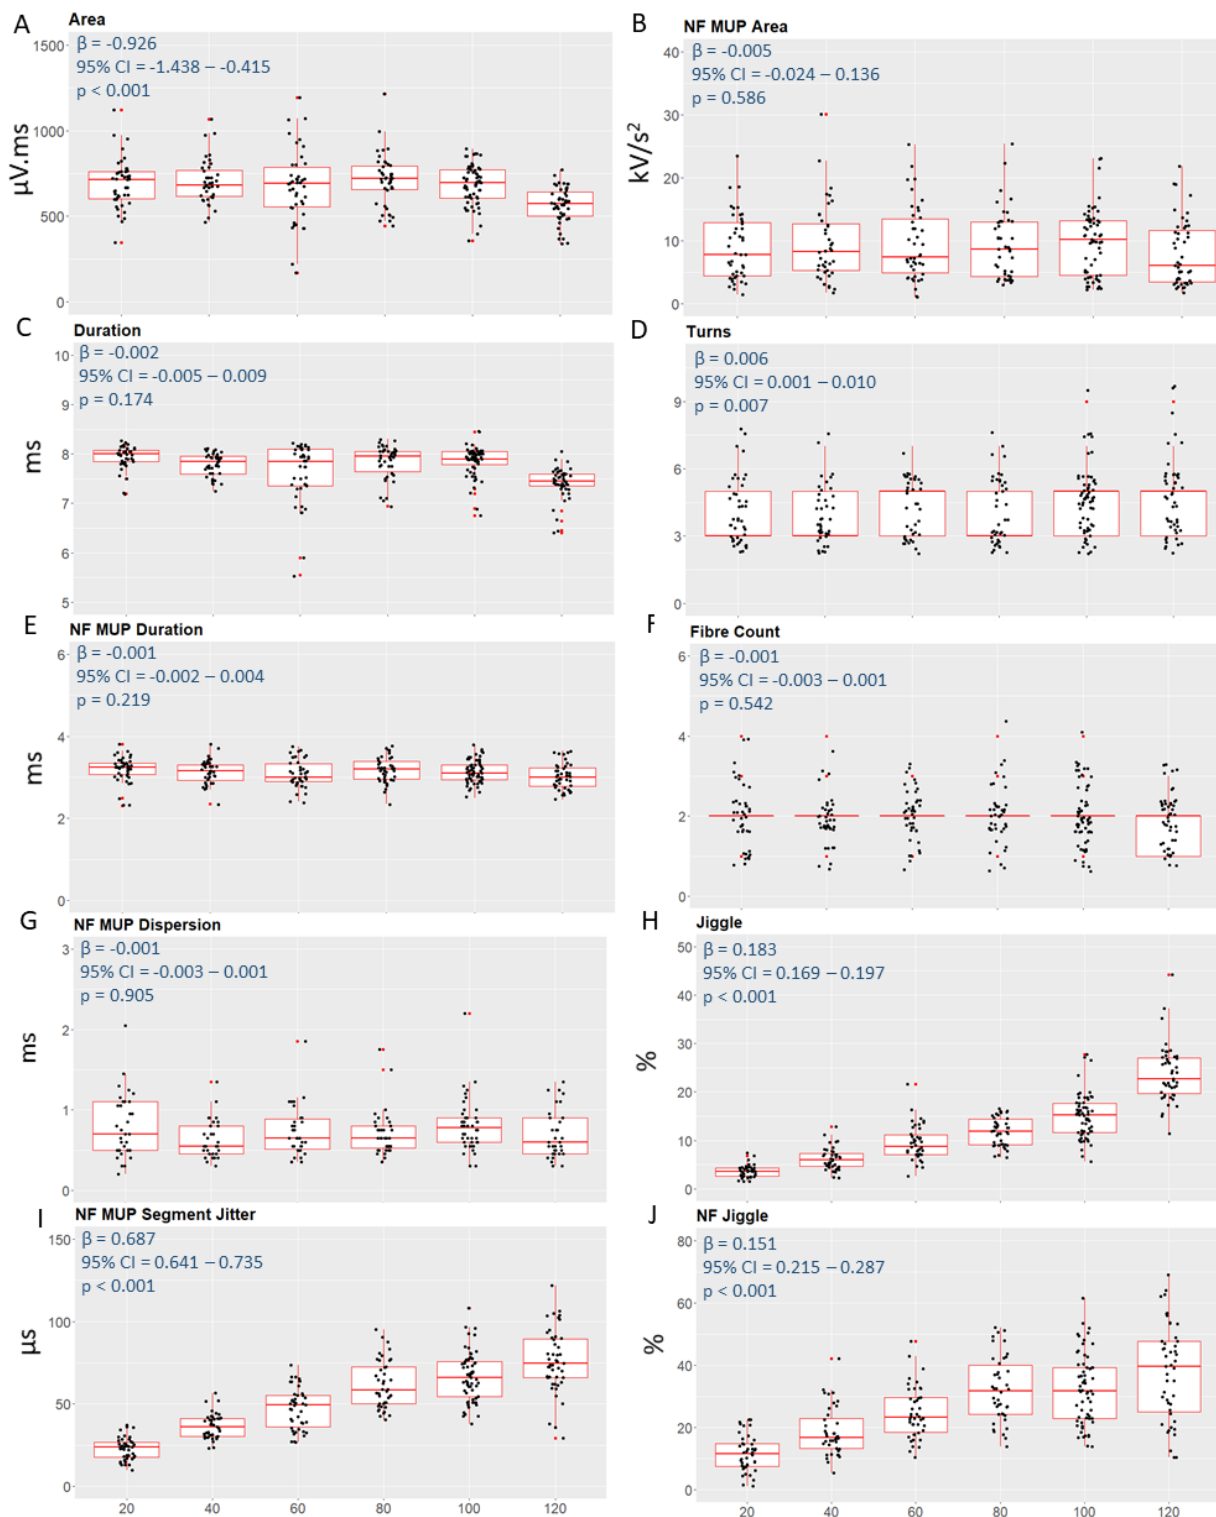

386

387 **Figure 4.** Motor unit potential and near fibre motor unit potential parameters with increased jitter. Beta  
388 coefficients, 95% confidence intervals and p values from multi level mixed effects linear regression shown  
389 inset for each parameter.

390

### 391 3.5 Exemplary Human Patient Data

392 Figures 5 to 7 show exemplary real EMG data from healthy, enlarging/reinnervating and depleted MUs of  
393 a control, neurogenic and myopathic subject, respectively.

394 Figure 5 shows a normal MUP template, an NFM template with moderate duration and dispersion and a  
395 stable NFM raster/shimmer. It corresponds to a 65 y.o. woman presenting with right lumbar pain and  
396 occasional paresthesia in the right L5 dermatome. EMG and MRI findings were normal and symmetric  
397 compared with the asymptomatic contralateral side. The MUP data displayed was taken from the  
398 contralateral asymptomatic gastrocnemius considered as a reference.

399 Figure 6 corresponds to a 70 y.o. male presenting with progressive asymmetric weakness, muscle mass  
400 loss and spasticity over the last year. Needle EMG revealed extended ongoing denervation (i.e. fibrillation  
401 potentials and positive sharp waves), fasciculations and reduced recruitment together with polyphasic  
402 unstable and enlarged MUPs in three body segments, meeting the revised El Escorial criteria for definite  
403 ALS. Panels A to C show different stages of MUP denervation-reinnervation. In panel A, two normal shaped  
404 and sized MUP templates along with NFM templates with increased dispersion and moderately unstable  
405 NFM shimmers, suggest an early stage of reinnervation. In panel B, two normal sized MUP templates with  
406 increased shape complexity as well as NFM templates with increased duration, dispersion and increasingly  
407 unstable NFM shimmers suggest an advanced stage of ongoing reinnervation. Panel C displays two  
408 enlarged MUP templates associated with NFM templates with increased duration and dispersion, and  
409 only moderately unstable NFM shimmers suggesting mature reinnervation, as well as a small MUP  
410 template associated with a NFM template with increased duration and dispersion and a stable NFM  
411 shimmer, possibly suggesting depletion of an enlarged MUP through degeneration of distal nerve  
412 terminals (de Carvalho & Swash, 2016).

413 Figure 7 corresponds to a middle-aged woman diagnosed with dermatopolymyositis in childhood  
414 currently on immunosuppressant at low doses for intercurrent arthritis (Azathioprine), who presented  
415 with symmetric residual weakness in proximal muscles during both moderate and sustained efforts.  
416 Needle EMG did not show evidence of active myositis and routine nerve conduction studies were  
417 anodyne. The figure shows a small size MUP template, complex in shape (increased number of turns) and  
418 a NFM template with increased NF counts and dispersion, but duration in the upper limit of normality and  
419 a stable NFM shimmer.

420

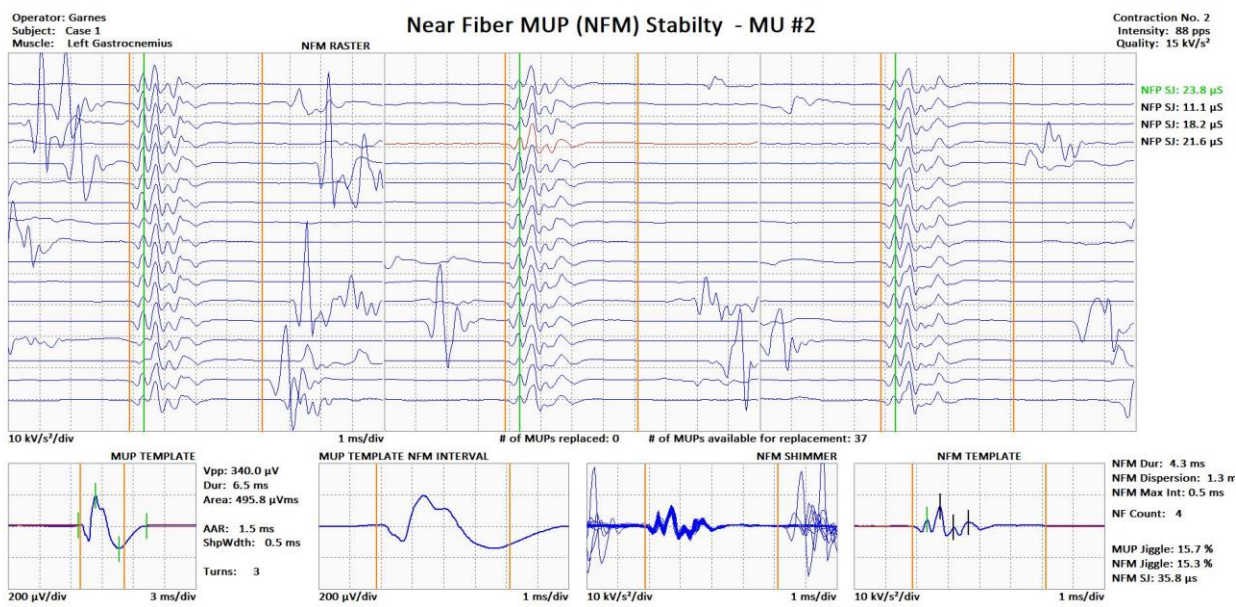

421

422 **Figure 5.** Data from a healthy MU in a healthy muscle (gastrocnemius) . A raster of 3, 12 ms sweep, columns  
423 of isolated NFMs, an 18 and 8 ms sweep MUP template, and an 8 ms sweep NFM shimmer and template  
424 are shown. The top to bottom vertical lines demarcate the NFM duration, in the NFM template the  
425 elements of the NFM count are demarcated by short vertical lines. The interval between the first and last  
426 short vertical line is the NFM dispersion. Associated MUP and NFM template as well as MUPT parameter  
427 values are shown. The MUP template is of somewhat below average size, the NFM template is of average  
428 duration and dispersion and the NFM raster/shimmer is stable. Note that the rasters of isolated NFMs as  
429 well as the calculated NFP SJ value indicate healthy NMJ transmission temporal stability in spite of slight  
430 needle movement during signal acquisition.

431

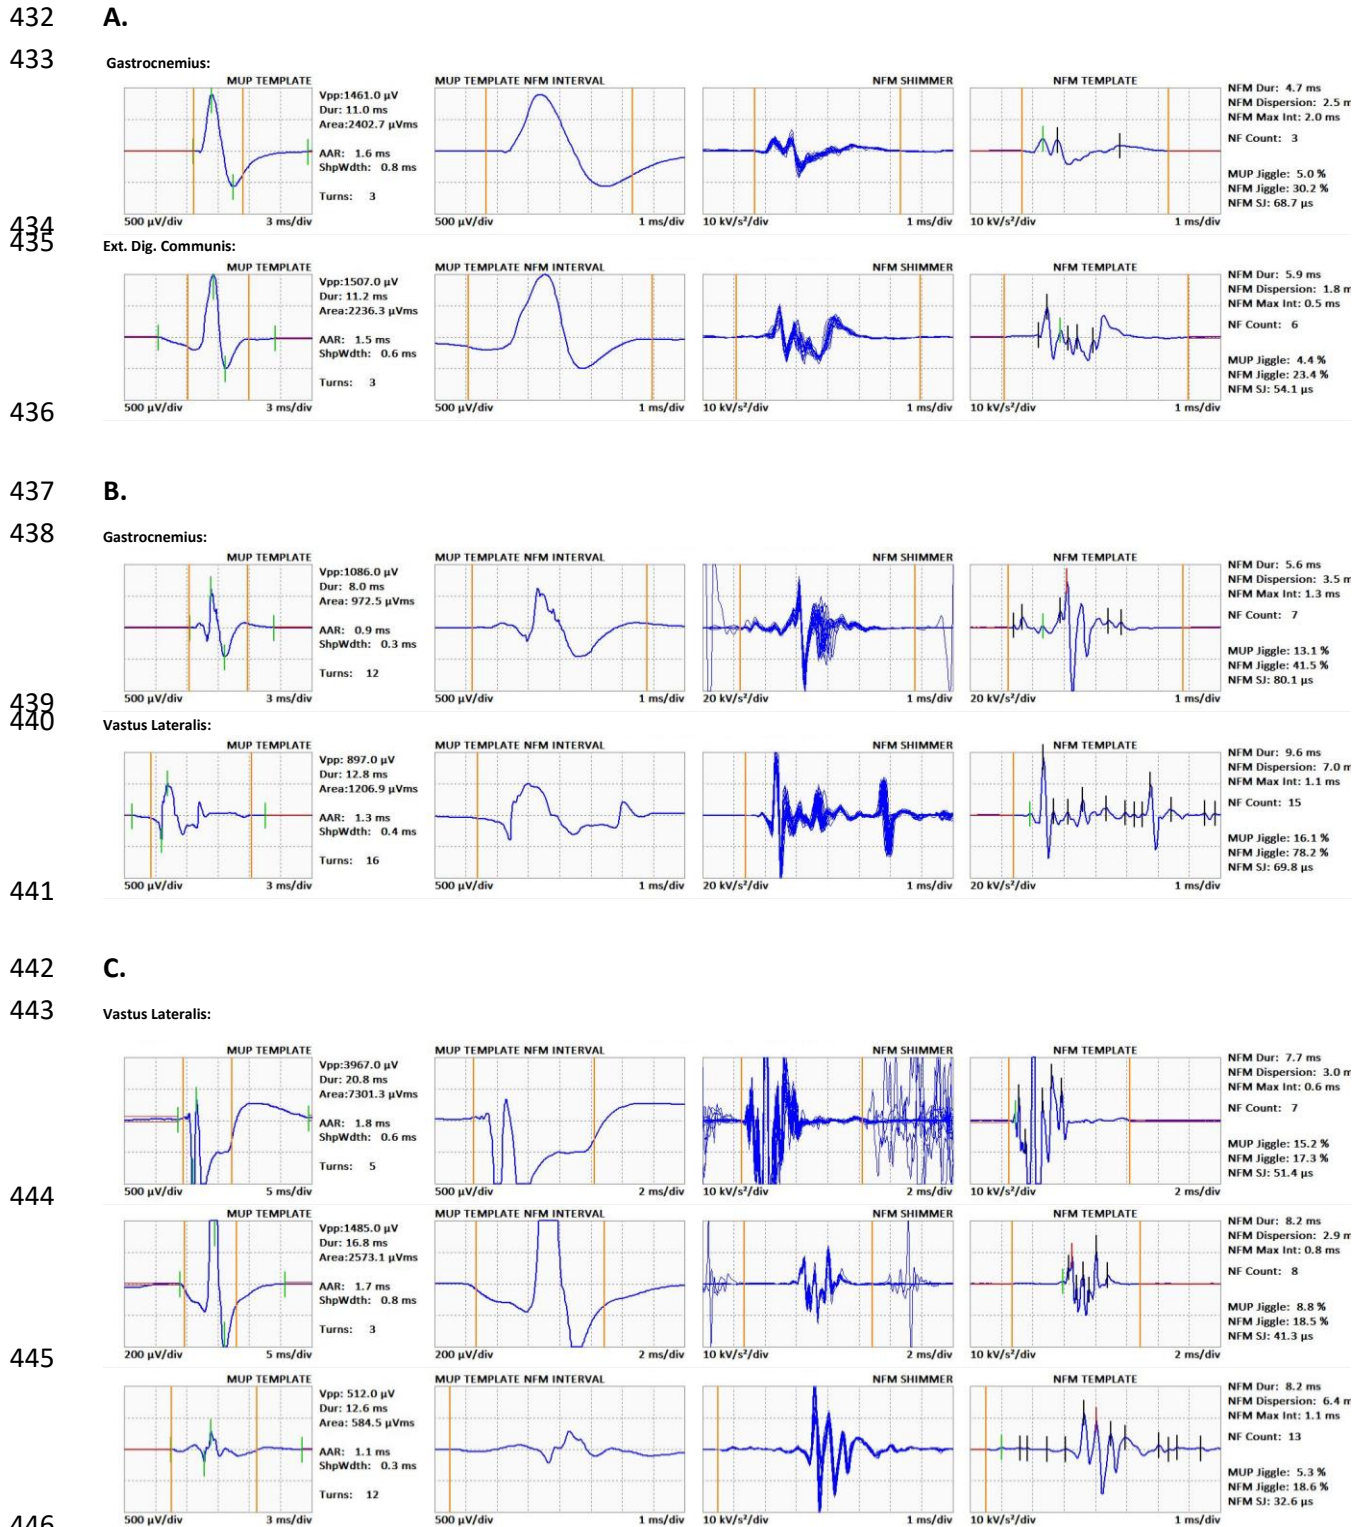

452 temporal dispersion (high NFM duration and dispersion). It is hypothesised that progression of certain  
 453 neurogenic disorders can cause partial denervation (see text). From left to right: MUP template,  
 454 MUP template NFM interval, NFM shimmer and NFM template are displayed. The top to bottom vertical lines  
 455 demarcate the NFM duration.  
 456

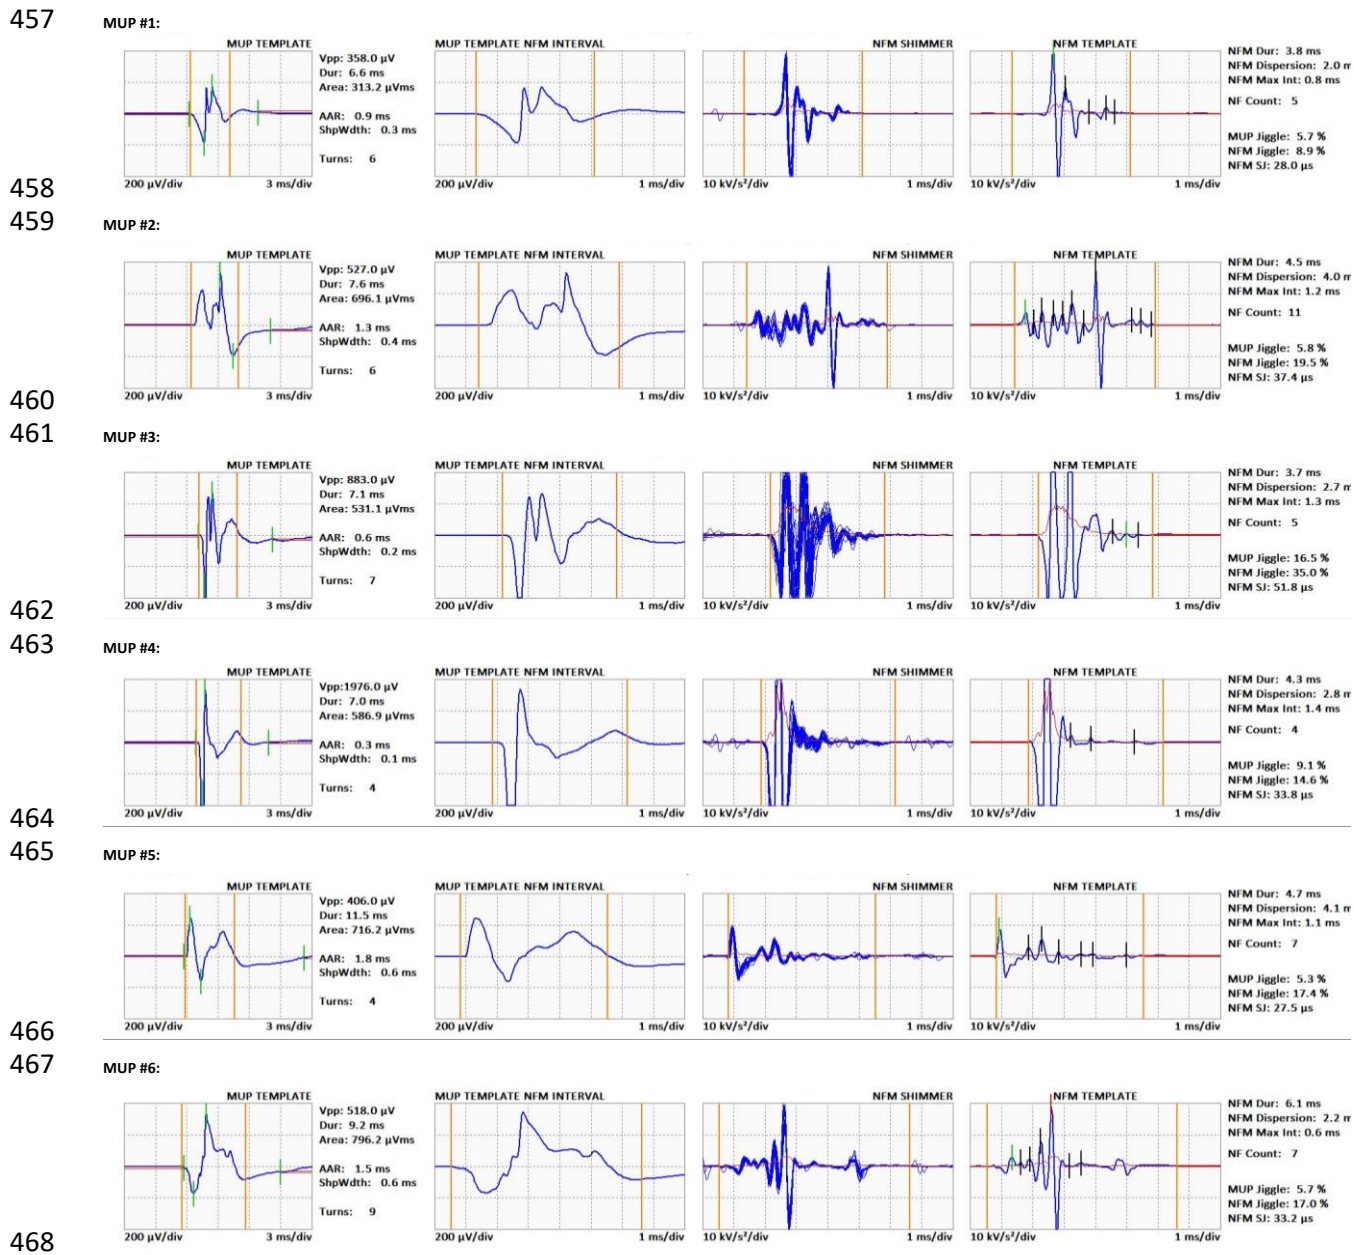

469 **Figure 7.** Example of a mild myopathic deltoid showing MUPs of partially depleted MUs recorded during  
 470 an isometric contraction during low level of activation. Each row corresponds to individual MUs from the  
 471 same contraction. From left to right: MUP template, MUP template NFM interval, NFM shimmer and NFM  
 472 template are displayed. The top to bottom vertical lines demarcate the NFM duration.

#### 473 **4.0 Discussion**

474 NFEMG focuses on contributions/MFPs of MU muscle fibres lying close to the detection surface of a  
475 needle electrode. NFM measurements of the number, temporal dispersion and temporal consistency of  
476 generated MFPs are dependent on local MU morphology and electrophysiology and as such can infer  
477 subtle MU changes as occurring with ageing and/or disease. As demonstrated with simulations of  
478 increased fibre diameter variability or endplate scatter, as the spread in the expected MFAP arrival times  
479 (i.e. the times at which the MFAPs are expected to pass closest to the center of the electrode detection  
480 surface) increases so do the number and temporal dispersion of detected MFPs. Increasing fibre diameter  
481 variability and end plate scatter are early effects of neuromuscular disorders and ageing and precursors  
482 to changes in MU size and fibre grouping. Being able to detect these initial MU changes potentially allows  
483 early more sensitive detection of MU abnormalities.

484 The effects of increasing amounts of simulated fibre diameter variability on MUP and NFM template and  
485 instability parameters are presented in Figure 1. MUP area decreases with increasing fibre diameter  
486 variability (MUP amplitude ( $V_{pp}$ ) follows the same pattern, values not shown) which can be a consequence  
487 of increased MFP dispersion associated with increasing fibre diameter variability, which can result in more  
488 destructive MFP superpositions causing phase cancelation, even though the number of contributing MFP  
489 remains constant. Notably, these effects would likely be reduced with a smaller axial distance separating  
490 the electrode and endplate region. MUP duration, in contrast, increased with increasing fibre diameter  
491 variability (Figure 1C) which can also be a consequence of increased MFP dispersion associated with  
492 increasing fibre diameter variability, ultimately increasing the time interval between MUP onset and end  
493 positions. These results are consistent with those of Stålberg & Karlsson (2001) who reported both MUP  
494  $V_{pp}$  and area decreases for simulated data with increases in MFP dispersion. NFM area was not affected  
495 by increased fibre diameter variability (Fig 1B) which can be related to the relatively smaller number of  
496 MFPs that make significant contributions to NFMs. As such, NFM area measures were in general more  
497 variable and did not show a clear relationship with fibre diameter variability. Turns and NF count both  
498 increased with fibre diameter variability (Fig 1 D, F) without increases in numbers of MU fibres or MU fibre  
499 density and specifically due to increases in MFP dispersion allowing increased numbers of MFP  
500 contributions to be detected. NFM duration and NF dispersion both increased with increases in fibre  
501 diameter variability (Fig 1 E,G). Each of these temporal measures are directly related to MFP dispersion  
502 and clearly reflect increases in MFP dispersion caused by increases in the range of MFAP conduction  
503 velocities associated with increases in fibre diameter variability. MUP jiggle, NFM jiggle and NFM SJ across  
504 MUPTs all had similar modest increases with increased MFP dispersion associated with increased fibre

505 diameter variability, explained by MFP contributions and their associated temporal variability becoming  
506 easier to observe.

507 The results of simulating increasing amounts of end plate scatter on MUP and NFM template and  
508 instability parameters are presented in Figure 2. Overall, the respective template parameters were  
509 similarly affected by increases in end plate scatter as with increases in fibre diameter variability. However,  
510 the effects of the amounts of endplate scatter were greater than those of the amounts of fibre diameter  
511 variability. The levels of endplate scatter simulated generated greater amounts of MFP dispersion which  
512 is reflected in the increased trends of the template parameter values. The MUP and NFM instability  
513 measures all had similar modest increases, which were, despite the increased amounts of MFP dispersion,  
514 similar in extent as with the fibre diameter variability simulations (Fig 2 H,J,I).

515 The effects of simulating MU remodelling, the denervation and reinnervation of fibres, on MUP and NFM  
516 template and instability parameters are presented in Figure 3. These data demonstrate effects of  
517 decreasing numbers of MU fibres (denervation), and increasing numbers of MU fibres along with  
518 increasing fibre diameter variability and endplate scatter (reinnervation). For MUs with fewer numbers of  
519 fibres, MUP area and duration decreased with decreasing numbers of MU fibres. The reversal of this  
520 pattern could be assumed of all other modelled parameters remained constant. For MUs with greater  
521 fibre numbers, diameter and endplate variability, MUP area clearly increased only after 40 fibres were  
522 added, while duration consistently increased with increasing numbers of MU fibres (Fig 3 A, C). For both  
523 scenarios NFM area remained constant but became more variable with increasing numbers of MU fibres  
524 and the increasing MFP dispersion modelled (Fig 3 B). Turns and NF count remained constant across  
525 decreasing numbers of MU fibres and both increased with increasing numbers of MU fibres and the  
526 increasing MFP dispersion modelled (Fig 3 D, F). NFM duration and dispersion remained constant across  
527 decreasing numbers of MU fibres and both increased with increasing numbers of MU fibres and the  
528 increasing MFP dispersion modelled (Fig 3 E, G). Across the increasing numbers of MU fibres simulated,  
529 NFM duration and dispersion clearly reflect the increasing level of MFP dispersion modelled. Despite the  
530 increased amounts of MFP dispersion modelled, the MUP and NFM instability measures all had similar  
531 modest increases, which were similar in extent as with the fibre diameter variability simulations (Fig 3  
532 H,J,I).

533 With or without MFP dispersion, MUP  $V_{pp}$  and area values were strongly correlated ( $r=0.82$ , data not  
534 shown). Without MFP dispersion (denervation), MUP area and MUP duration decreased and reflects the  
535 number of MU fibres. However with MFP dispersion (reinnervation), MUP area showed little change and

536 MUP duration increased, therefore either may not reflect the number of MU fibres. NFM area is less  
537 affected by MFP dispersion than MUP area and duration. Therefore, if MFP dispersion is increased, NFM  
538 area may not be strongly correlated with MUP area or duration but nonetheless can be reflective of the  
539 number of MU fibres. NF count is well correlated with number of turns and can equally reflect the MFP  
540 dispersion underlying MUP/NFM complexity. NF count is not directly related to fibre density  
541 measurements obtained using a SFEMG electrode (Stalberg and Thiele 1975) because to obtain the latter  
542 measurements, the needle is positioned to obtain minimal MUP rise times from a single MU, whereas for  
543 the former, the needle is positioned to obtain suitably sharp MUPs across the interference pattern. NFM  
544 duration is strongly correlated with NFM dispersion and both most clearly and directly reflect MFP  
545 dispersion.

546 The results of simulating increasing amounts of jitter on MUP and NFM template and instability  
547 parameters are presented in Figure 4. MUP area and duration drop for high jitter values (Fig 4 A, C). All  
548 other MUP and NFM template parameters are unaffected by increasing jitter. However, MUP and NFM  
549 jiggle and NFM SJ values increased with increasing jitter (Fig 4 H, J, I) and are therefore all strongly  
550 correlated with and clearly reflect NMJ transmission time variability.

551 Unlike fibre pair jitter, measured using a single-fibre or concentric needle electrode to detect sets of MFP  
552 contributions from isolated pairs of muscle fibres (Sanders & Stålberg, 1996; Stålberg & Sanders, 2009),  
553 MUP and NFM jiggle and NFM SJ represent the amount of MFP temporal variability across all of the MFPs  
554 significantly contributing to the MUPs/NFMs of a MUPT. Jiggle expresses MFP temporal variability  
555 (primarily NMJ transmission time variability) by measuring MUP instability along the amplitude axis. Jiggle,  
556 measured using sums of median consecutive absolute amplitude differences, which reduce the effects of  
557 small needle movements and contamination from other MUs, and the ratio to template area, which  
558 reduces the effects of needle focusing/positioning, was determined the best of several instability  
559 measures considered by Stålberg and Sonoo, 1994. Nonetheless, in real signals, MUP jiggle values are  
560 more contaminated by contributions from other MUs (Campos et al. 2000) than are NFM jiggle or NFM SJ  
561 values. Algorithms used in this work to extract MUPTs and to select isolated MUPs/NFMs are specifically  
562 designed to account for MUP/NFM instability, to minimize the effects of needle positioning/focusing and  
563 to effectively align MUPs/NFMs for instability assessment to reduce contamination and other sources of  
564 instability measurement error described in earlier works (Campos et al., 2000; Stålberg & Sonoo, 1994).

565 With jitter held at a constant “reference” value (25  $\mu$ s), MUP and NFM jiggle and NFM SJ increased with  
566 MFP temporal dispersion as the effects of more individual MFP components could be determined (Fig. 1



567 H,I,J and Fig. 2 H,I,J). However, the increased values do not exceed “reference” values (<50%, < 50  $\mu$ s).  
568 Stålberg & Sonoo (1994) discussed how MUP polyphasia, caused by increased MFP temporal dispersion  
569 exposes inherent/true instability which can be masked with decreased MFP temporal dispersion where  
570 jittering MFPs are simply consistently superimposed such that the apparent/measurable jitter/temporal  
571 instability is reduced. In other words, instability measures can increase due solely to MFP temporal  
572 dispersion as the inherent/true temporal variability can be more accurately measured. This in turn  
573 suggests that increased polyphasia without increased jiggle can indicate chronic myopathic fibre diameter  
574 variability increases (Stålberg & Sonoo, 1994). MUP jiggle was affected more by mean MFP temporal  
575 dispersion than were NFM jiggle and NFM SJ and NFM SJ was affected more by mean MFP temporal  
576 dispersion than was NFM jiggle. Due to the larger MUs simulated, 100+ here versus their 10 fibres, the  
577 drop in MUP jiggle versus MU size reported by Stålberg & Sonoo was not apparent in this data for either  
578 MUP and NFM jiggle of NFM SJ (Fig 3 H,J,I). Even though for small amounts of jitter (20  $\mu$ s), its mean values  
579 were relatively high and for high amounts of jitter (100 and 120  $\mu$ s) its mean values were relatively low,  
580 the temporally based NFM SJ measure had the strongest relationship with increasing jitter. Because  
581 increases in NFM SJ more closely track those of simulated jitter it can be considered more directly related  
582 to the inherent temporal instability of MFP contributions to MUPs than are MUP and NFM jiggle, and is  
583 therefore more sensitive for detecting temporal instability in MUPTs.

584 Figures 5 to 7 show exemplary real data recorded from healthy, expanding and depleted MUs,  
585 respectively. Results from a healthy MU (Fig 5) show a moderate MUP area (size), with average NFM  
586 duration and dispersion and stable NFM raster and shimmer plots (healthy NMJ transmission). Results  
587 from the expanding MU (Fig 6) show two average size MUPs (panel A), with incipient increases in NFM  
588 duration and dispersion and increased instability in the NFM shimmer plot (increased NMJ transmission  
589 time variability reflecting emerging reinnervation). In panel 6B results from two average size MUPs with  
590 increased shape complexity show prominent increases in NFM duration, dispersion and NFM shimmer  
591 instability, reflecting prominent reinnervation. Whereas panel 6C shows an enlarged, a moderately  
592 enlarged and a reduced sized MUP, all with increased and similar NFM duration and dispersion values and  
593 rather stable NFM shimmer plots, possibly resembling distal axonal damage affecting longstanding  
594 enlarged and stable MUs as part of the neurogenic process. Results from the depleted MU (Fig 7) show  
595 slightly reduced MUP sizes, with increased NFM duration and dispersion and stable NFM shimmer plots.  
596 The NFM duration and dispersion (7.7, 8.2 and 3.0, 2.9 ms, respectively) measured for the two expanding  
597 MUs in Figure 6C are clearly longer than for the healthy MU (4.3 and 1.3 ms, respectively) and greater

598 than for any values obtained from simulations of only increased fibre diameter variability. This suggests,  
599 an MFP dispersion associated with more than just increased fibre diameter variability. It suggests some  
600 degree of increased end plate scatter and possibly some increased fibre diameter variability consistent  
601 with axonal branch sprouting and possibly some fibre atrophy and/or hypertrophy. The increased NFM SJ  
602 value in both MUPs in panel 6A (68.7 and 54.1  $\mu$ s) clearly suggests increased NMJ transmission time  
603 variability consistent with immature/nascent NMJ formations. All of these NFM results are consistent  
604 with ongoing reinnervation and given that their respective MUP areas (2402 and 2236  $\mu$ Vms) are only  
605 slightly increased and duration is within the normal range (11.0 and 11.2 ms, respectively) suggests an  
606 initial/early stage of reinnervation.

607 When considering myopathic depleted MUs (Fig 7), NF count, NFM duration and dispersion values, for all  
608 the MUs sampled from a single contraction, are longer than for the healthy MU (4, 4.3 ms and 1.3 ms,  
609 respectively) and greater than for any values obtained from simulations of only increased fibre diameter  
610 variability. This suggests an MFP dispersion associated with more than just increased fibre diameter  
611 variability. It suggests some degree of increased end plate scatter and possibly some increased fibre  
612 diameter variability consistent with axonal branch sprouting and possibly some fibre atrophy and/or  
613 hypertrophy. The reduced MUP areas and normal durations suggest MUs may have reduced numbers of  
614 fibres of variable diameter and possibly some increased end plate scatter.

615 Sonoo, 2002 suggests the most important aspects of MU changes caused by neuromuscular disorders  
616 manifest as recruitment abnormalities, rather than as changes in MUP morphology. However, NFM  
617 measurements have the ability to reflect MU changes before the MUs and/or the numbers of MUs in a  
618 muscle significantly change and therefore before significant changes in MUP size (See Fig. 6 B). Sonoo,  
619 2002 also suggests that needle position (focusing) and the level of muscle activation during MU sampling,  
620 greatly influence the parameters of sampled MUPs. NFM measures of dispersion and instability are not  
621 directly dependent of MUP size and shape and therefore are less affected by focusing and level of  
622 activation. And finally, Sonoo, 2002 suggests that MUP duration, considered to be the cardinal parameter  
623 in MUP analysis, has several drawbacks, including high measurement variability and low discriminant  
624 sensitivity. This is no doubt true when baseline noise affects onset and end marker positions. However,  
625 for low noise waveforms, as with the noise-free simulated data, MUP duration, as suggested by (Buchthal  
626 and Rosenfalck 1955), is most sensitive to MU size. MUP duration increases with MU size and MFP  
627 dispersion, while MUP area increases with MU size but decreases with MFP dispersion, which often  
628 accompanies MU enlargement via reinnervation, and therefore confounds the relationship between MU

629 size and MUP area (See Figs. 1C, 2C, 3C and 4C). Nonetheless in practice, low-noise waveforms may not  
630 be available and therefore area, which is highly repeatable in young and old muscles (Piasecki et al. 2018),  
631 and less affected by specific onset and end marker positions may better reflect MU size, despite its  
632 decreases with MFP dispersion. Actually, increased MUP duration results from several factors in addition  
633 to the number of innervated muscle fibres, including end-plate scatter, NMJ transmission delay, and slow  
634 conduction through terminal branching axonal sprouts. This results in decreased synchronicity of muscle  
635 fibre activation (i.e. MFP generation) across a motor unit, and increased MUP duration (de Carvalho &  
636 Swash, 2016). As shown in the simulated data results, NFM duration and NF dispersion are both very  
637 sensitive to MFP temporal dispersion caused by fibre diameter variability and/or end plate scatter (which  
638 as simulated can also account for NMJ transmission delay and slow axonal branch conduction).

639 With active denervation and reinnervation MUPs and NFMs are unstable. Newly-formed, immature end-  
640 plates have immature acetylcholine receptor subunits, with a lower safety factor for neuromuscular  
641 transmission (Stålberg, 1982; Stålberg & Antoni, 1980). In addition, slowed distal motor nerve conduction  
642 in partially myelinated regenerating nerve fibres and atrophied, newly reinnervated muscle fibres leads  
643 to increased fibre diameter variability and end plate scatter which results in sufficient MFP dispersion that  
644 the inherent NMJ transmission time variability can be accurately measured. For these measurements,  
645 Stålberg and Sonoo (1994) suggest MUP instability, the 'jiggle', is best evaluated using a 500 Hz or 1 kHz  
646 high-pass filter, giving important qualitative information regarding MUP morphology and MUP instability.  
647 NFM jiggle and NFM SJ are both based on high-pass filtered signals and both can provide useful measures  
648 strongly related to NMJ transmission time variability. MUP instability anticipates the development of  
649 neurogenic MUPs as shown by concentric needle EMG (de Carvalho & Swash, 2013) and can be useful in  
650 differential diagnoses. (See Fig 6A and B). Furthermore, de Carvalho et al., 2014 report that mean MUP  
651 duration and jitter increases are the most sensitive parameters for tracking ALS and that at the end stages  
652 of ALS, small MUPs may be observed, possibly resulting from degeneration of distal nerve terminals  
653 through axonal dying-back pathology (de Carvalho & Swash, 2016) (possibly the lower MU shown in Fig  
654 6C). As such, MUP area, NFM duration, NFM dispersion, NFM jitter and NFM SJ, assessed together are  
655 well suited for detecting and tracking MU morphology and electrophysiological changes.

## 656 **Conclusion**

657 Standard needle EMG examination can detect fibre denervation, reinnervation, loss, atrophy and  
658 hypertrophy, but detecting initial changes and quantifying their extent and progress requires more  
659 sophisticated techniques which can also provide a temporal profile of a disease process across longitudinal

660 examinations. The data presented here demonstrate NFEMG methods can augment a standard needle  
661 EMG examination with quantitative MU morphological and electrophysiological information and can be  
662 applied to study the neural effects of specific disease processes and ageing.

663

#### 664 **Declaration of Competing Interest**

665 The authors declare that they have no known competing financial interests or personal relationships that  
666 could have appeared to influence the work reported in this paper.

667

#### 668 **Acknowledgements**

669 Mathew Piasecki is supported by the Medical Research Council [grant number MR/P021220/1] as part of  
670 the MRC-Versus Arthritis Centre for Musculoskeletal Ageing Research awarded to the Universities of  
671 Nottingham and Birmingham, and by the NIHR Nottingham Biomedical Research Centre.

672

#### 673 **References**

- 674 Allen MD, Stashuk DW, Kimpinski K, Doherty TJ, Hourigan ML, Rice CL. Increased neuromuscular  
675 transmission instability and motor unit remodelling with diabetic neuropathy as assessed using  
676 novel near fibre motor unit potential parameters. *Clin Neurophysiol.* 2015;
- 677 Buchthal F, Rosenfalck P. ACTION POTENTIAL PARAMETERS IN DIFFERENT HUMAN MUSCLES. *Acta*  
678 *Psychiatr Scand.* 1955;30(1-2):125–31.
- 679 Campos C, Malanda A, Gila L, Segura V, Lasanta I, Artieda J. Quantification of jiggle in real  
680 electromyographic signals. *Muscle Nerve.* 2000;23(7):1022–34.
- 681 de Carvalho M, Swash M. Origin of fasciculations in amyotrophic lateral sclerosis and benign  
682 fasciculation syndrome. *JAMA Neurol.* 2013;70(12):1562–5.
- 683 de Carvalho M, Swash M. Lower motor neuron dysfunction in ALS. *Clin Neurophysiol.* 2016;127(7):2670–  
684 81.
- 685 Carvalho M De, Turkman A, Swash M. Sensitivity of MUP parameters in detecting change in early ALS.  
686 *Clin Neurophysiol.* 2014;125(1):166–9.
- 687 Daube JR. Electrodiagnostic studies in amyotrophic lateral sclerosis and other motor neuron disorders.  
688 *Muscle and Nerve.* 2000;23(10):1488–502.
- 689 Estruch OGC, Cano GD, Stashuk D. P32-S Application of decomposition based quantitative EMG  
690 (DQEMG) to focal neuropathies. *Clin Neurophysiol.* 2019;130(7):e104.
- 691 Estruch OGC, Stashuk D. P36-S Validation of near fiber motor unit potential stability and dispersion  
692 measures using simulated signals. *Clin Neurophysiol.* 2019;130(7):e104.

- 693 Gilmore KJ, Allen MD, Doherty TJ, Kimpinski K, Rice CL. Electrophysiological and neuromuscular stability  
694 of persons with chronic inflammatory demyelinating polyneuropathy. *Muscle and Nerve*.  
695 2017;56(3):413–20.
- 696 Heckman CJ, Enoka RM. Motor unit. *Compr Physiol* [Internet]. 2012;2(4):2629–82. Available from:  
697 <http://www.ncbi.nlm.nih.gov/pubmed/23720261>
- 698 Hourigan ML, McKinnon NB, Johnson M, Rice CL, Stashuk DW, Doherty TJ. Increased motor unit  
699 potential shape variability across consecutive motor unit discharges in the tibialis anterior and  
700 vastus medialis muscles of healthy older subjects. *Clin Neurophysiol*. 2015;126(12).
- 701 McGill KC, Cummins KL, Dorfman LJ. Automatic Decomposition of the Clinical Electromyogram. *IEEE*  
702 *Trans Biomed Eng*. 1985 Jul;BME-32(7):470–7.
- 703 Payan J. The blanket principle: A technical note. *Muscle Nerve*. 1978;1(5):423–6.
- 704 Piasecki J, Inns TB, Bass JJ, Scott R, Stashuk DW, Bethan E, et al. Influence of sex on the age-related  
705 adaptations of neuromuscular function and motor unit properties in elite masters athletes. *J*  
706 *Physiol*. 2020;
- 707 Piasecki M, Ireland A, Coulson J, Stashuk DW, Hamilton-Wright A, Swiecicka A, et al. Motor unit number  
708 estimates and neuromuscular transmission in the tibialis anterior of master athletes: evidence that  
709 athletic older people are not spared from age-related motor unit remodeling. *Physiol Rep*.  
710 2016a;4(19).
- 711 Piasecki M, Ireland A, Piasecki J, Stashuk DW, McPhee JS, Jones DA. The reliability of methods to  
712 estimate the number and size of human motor units and their use with large limb muscles. *Eur J*  
713 *Appl Physiol*. 2018;118(4):767–75.
- 714 Piasecki M, Ireland A, Stashuk D, Hamilton-Wright A, Jones DA, McPhee JS. Age-related neuromuscular  
715 changes affecting human vastus lateralis. *J Physiol*. 2016b Aug;594(16):4525–36.
- 716 Power GA, Allen MD, Gilmore KJ, Stashuk DW, Doherty TJ, Hepple RT, et al. Motor unit number and  
717 transmission stability in octogenarian world class athletes: Can age-related deficits be outrun? *J*  
718 *Appl Physiol*. 2016 Oct;121(4):1013–20.
- 719 Sanders DB, Stålberg E V. AAEM minimonograph 25: Single-fiber electromyography. *Muscle and Nerve*.  
720 1996;19(9):1069–83.
- 721 Sonoo M. New attempts to quantify concentric needle electromyography. *Muscle Nerve*.  
722 2002;999(S11):S98–102.
- 723 Stålberg E. Electrophysiological studies of reinnervation in ALS. *Adv Neurol*. 1982;36:47–59.
- 724 Stålberg E. Jitter analysis with concentric needle electrodes. *Ann N Y Acad Sci*. 2012;1274(1):77–85.
- 725 Stålberg E, Antoni L. Electrophysiological cross section of the motor unit. *J Neurol Neurosurg Psychiatry*.  
726 1980 Jun;43(6):469–74.
- 727 Stålberg E, Karlsson L. Simulation of the normal concentric needle electromyogram by using a muscle  
728 model. *Clin Neurophysiol*. 2001;112(3):464–71.
- 729 Stalberg E, Thiele B. Motor unit fibre density in the extensor digitorum communis muscle. Single fibre  
730 electromyographic study in normal subjects at different ages. *J Neurol Neurosurg Psychiatry*

- 731 [Internet]. 1975;38(9):874–80. Available from: <http://www.ncbi.nlm.nih.gov/pubmed/1185226>
- 732 Stålberg E V., Sanders DB. Jitter recordings with concentric needle electrodes. *Muscle and Nerve*.  
733 2009;40(3):331–9.
- 734 Stålberg E V., Sonoo M. Assessment of variability in the shape of the motor unit action potential, the  
735 “jiggle,” at consecutive discharges. *Muscle Nerve*. 1994;17(10):1135–44.
- 736 Stashuk DW. Decomposition and quantitative analysis of clinical electromyographic signals. *Med Eng*  
737 *Phys* [Internet]. 1999a;21(6–7):389–404. Available from:  
738 <http://www.ncbi.nlm.nih.gov/pubmed/10624736>
- 739 Stashuk DW. Detecting single fiber contributions to motor unit action potentials. *Muscle Nerve*  
740 [Internet]. 1999b;22(2):218–29. Available from: <http://www.ncbi.nlm.nih.gov/pubmed/10024135>
- 741 Usui S, Amidror I. Digital Low-Pass Differentiation for Biological Signal Processing. *IEEE Trans Biomed*  
742 *Eng*. 1982 Oct;BME-29(10):686–93.
- 743
- 744
- 745
- 746
